# Supplementary material for: In Vitro Anti-Inflammatory and Regenerative Effects of Autologous Conditioned Serum from Dogs with Osteoarthritis
Source: MDPI journal article supplement (doi:10.3390/ani12192717), 2022-10-10
Supplement: s1 [file s1]

**Table S1.** For gene expression analysis, primer sequences used are as following:

| Name of Genes           |          | Primer Sequence              | Amplicon Length (bp) |
|-------------------------|----------|------------------------------|----------------------|
| <i>Collagen type I</i>  | Forward: | 5'-CATCCCAGCCAAGAACTGGT-3'   | 139                  |
|                         | Reverse: | 5'-GAAGGCGAGTTGAGTAGCCA-3'   |                      |
| <i>Collagen type II</i> | Forward: | 5'-CACTGCCAACGTCCAGATGA-3'   | 215                  |
|                         | Reverse: | 5'-GTTTCGTGCAGCCATCCTTC-3'   |                      |
| <i>Aggrecan</i>         | Forward: | 5'-ACTTCCGCTGGTCAGATGGA-3'   | 111                  |
|                         | Reverse: | 5'-TCTCGTGCCAGATCATCACC-3'   |                      |
| <i>MMP-13</i>           | Forward: | 5'-GGCTTAGAGGTCACTGGCAAAC-3' | 118                  |
|                         | Reverse: | 5'-TGGACCACTTGAGAGTTCGGG-3'  |                      |
| <i>Sox9</i>             | Forward: | 5'-GCCGAGGAGGCCACCGAACA-3'   | 179                  |
|                         | Reverse: | 5'-CCCGGCTGCACGTCGGTTTT-3'   |                      |
| <i>GAPDH</i>            | Forward: | 5'-CTGAACGGGAAGCTCACTGG-3'   | 129                  |
|                         | Reverse: | 5'-CGATGCCTGCTTCACTACCT-3'   |                      |
